# Supplementary material for: The Relationship of Motor Coordination, Visual Perception, and Executive Function to the Development of 4–6-Year-Old Chinese Preschoolers’ Visual Motor Integration Skills
Source: Hindawi journal article supplement (doi:10.1155/2017/6264254), 2017-01-01
Supplement: f1 [file 6264254.f1.pdf]

## Supplemental materials

### of “The Contribution of Motor Coordination, Visual Perception and Executive Function to the Development of 4-6 years old Chinese Preschoolers’ Visual Motor Integration Skills”

**Ying Fang,<sup>1</sup> Jingmei Wang,<sup>1</sup> Ying Zhang<sup>1</sup>, Jinliang Qin<sup>1</sup>**

<sup>1</sup> Hangzhou College of Early Childhood Teachers’ Education, Zhejiang Normal University, 310012, Hangzhou, China

1. The linear regression was used for the younger 4 years old (4 years to 4 years and 5 months), the elder 4 years old (4 years and 6 months to 4 years and 11 months), the younger 5 years old (5 years to 5 years and 5 months) and the elder 5 years old (5 years and 6 months to 5 years and 11 months). Tables are shown below.

TABLE 1: Motor coordination, visual perception predicting visual motor integration skills of the younger 4 years old children

| Variable | <i>B</i> | SE   | $\beta$ |
|----------|----------|------|---------|
| MC       | 0.54**   | 0.13 | 0.61    |
| VP       | 0.20*    | 0.09 | 0.31    |

Note: MC=Motor Coordination; VP=Visual perception; the younger 4 years old = from 4 to 4 and 5months years old

\* $p<0.05$ ; \*\* $p<0.01$

TABLE 2: Motor coordination predicting visual motor integration skills of the elder 4 years old children

| Variable | <i>B</i> | SE   | $\beta$ |
|----------|----------|------|---------|
| MC       | 0.45**   | 0.13 | 0.56    |

Note: MC=Motor Coordination; the elder 4 years old = from 4 and 5months to 4 and 11 months years old

\*\* $p<0.01$

TABLE 3: Inhibitory control predicting visual motor integration skills of the younger 5 years old children

| Variable | <i>B</i> | SE   | $\beta$ |
|----------|----------|------|---------|
| IC       | 0.21*    | 0.10 | 0.38    |

Note: IC= inhibitory control; the younger 5 years old = from 5 to 5 and 5months years old

\* $p<0.05$

TABLE 4: Motor coordination predicting visual motor integration skills of the elder 5 years old children

| Variable | <i>B</i> | SE   | $\beta$ |
|----------|----------|------|---------|
| MC       | 0.42*    | 0.17 | 0.42    |

Note: MC=Motor Coordination; the elder 5 years old = from 5 and 5months to 5 and 11 months years old

\* $p<0.05$

2. Figure 1: Mean standard score of VMI standard scores of children at five age groups

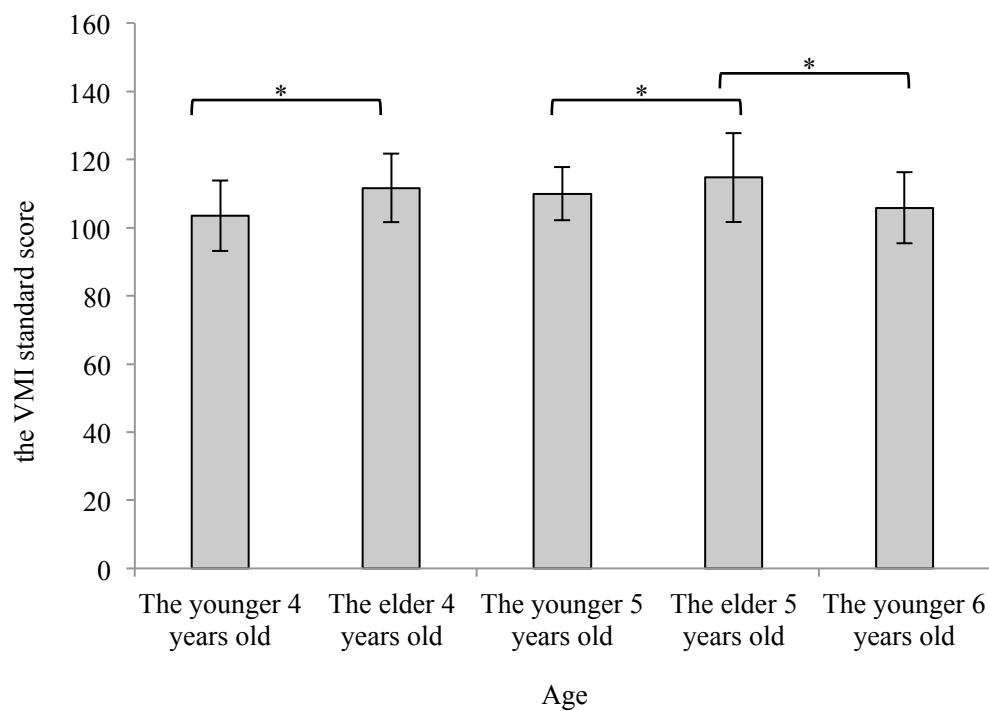

FIGURE1: Mean standard score of VMI standard scores of children at five age groups  
\* $p<0.05$
